# Supplementary material for: Maternal weight and paediatric health use: mediating role of adverse birth outcomes: a retrospective cohort study
Source: Springer Nature journal article supplement (doi:10.1186/s12884-023-05744-w), 2023-07-31
Supplement: MOESM1 [file 25869008]

**Supplemental Information**

Table S1: Health Canada gestational weight gain recommendations <sup>11</sup>.

| Pre-Pregnancy BMI           | Recommended Total Weight Gain |         |
|-----------------------------|-------------------------------|---------|
|                             | Kg                            | lb      |
| < 18.5 kg/m <sup>2</sup>    | 12.5 - 18                     | 28 - 40 |
| 18.5-24.9 kg/m <sup>2</sup> | 11.5 - 16                     | 25 - 35 |
| 25.0-29.9 kg/m <sup>2</sup> | 7 - 11.5                      | 15 - 25 |
| ≥30.0 kg/m <sup>2</sup>     | 5 - 9                         | 11 - 20 |

Mediators of Paediatric Health Service Use

Table S2A: Characteristics stratified by pre-pregnancy BMI

| <b>Characteristics</b>                  | <b>Total</b> | <b>Under-weight<br/>(N)</b> | <b>Normal weight<br/>(N)</b> | <b>Over-weight<br/>(N)</b> | <b>Obese<br/>(N)</b> | <b>Missing<br/>(N)</b> |
|-----------------------------------------|--------------|-----------------------------|------------------------------|----------------------------|----------------------|------------------------|
| <b>All births</b>                       | 258005       | 10901                       | 108170                       | 48141                      | 36950                | 53843                  |
| <b>Maternal age (years)</b>             |              |                             |                              |                            |                      |                        |
| <20                                     | 7012         | 767                         | 3233                         | 946                        | 682                  | 1384                   |
| 20-24                                   | 29983        | 2023                        | 12445                        | 5292                       | 4428                 | 5795                   |
| 25-29                                   | 71571        | 3317                        | 30150                        | 13358                      | 10686                | 14060                  |
| 30-34                                   | 92040        | 3186                        | 39428                        | 17384                      | 12670                | 19372                  |
| 35-40                                   | 50852        | 1475                        | 20509                        | 9871                       | 7478                 | 11519                  |
| ≥41                                     | 6528         | 132                         | 2403                         | 1289                       | 1004                 | 1700                   |
| Missing                                 | 19           | **                          | **                           | **                         | **                   | 13                     |
| <b>Smoking during pregnancy</b>         |              |                             |                              |                            |                      |                        |
| No                                      | 229007       | 9226                        | 98264                        | 43561                      | 32529                | 45427                  |
| Yes                                     | 21326        | 1466                        | 8195                         | 3889                       | 3901                 | 3875                   |
| Missing                                 | 7672         | 209                         | 1711                         | 691                        | 520                  | 4541                   |
| <b>Neighbourhood income quintile</b>    |              |                             |                              |                            |                      |                        |
| 1 (lowest)                              | 55701        | 2672                        | 21064                        | 10695                      | 9189                 | 12081                  |
| 2                                       | 51333        | 2371                        | 20797                        | 9679                       | 7780                 | 10706                  |
| 3                                       | 51866        | 2072                        | 21846                        | 9857                       | 7550                 | 10541                  |
| 4                                       | 54961        | 2095                        | 23982                        | 10136                      | 7274                 | 11474                  |
| 5 (highest)                             | 41856        | 1596                        | 19607                        | 7345                       | 4758                 | 8550                   |
| Missing                                 | 2288         | 95                          | 874                          | 429                        | 399                  | 491                    |
| <b>Infant sex</b>                       |              |                             |                              |                            |                      |                        |
| Male                                    | 132231       | 5623                        | 55459                        | 24631                      | 18939                | 27579                  |
| Female                                  | 125629       | 5274                        | 52644                        | 23477                      | 17990                | 2624                   |
| Missing                                 | 145          | **                          | 67                           | 33                         | 21                   | 20                     |
| <b>Gestational age at birth (weeks)</b> |              |                             |                              |                            |                      |                        |
| <37                                     | 15211        | 715                         | 5670                         | 2697                       | 2244                 | 3885                   |
| ≥37                                     | 242794       | 10186                       | 102500                       | 45444                      | 34706                | 49958                  |
| <b>Birth weight (grams)</b>             |              |                             |                              |                            |                      |                        |
| <2500                                   | 11762        | 807                         | 4648                         | 1823                       | 1416                 | 3068                   |
| ≥2500                                   | 246243       | 10094                       | 103522                       | 46318                      | 35534                | 50775                  |

\*\* Compressed due to small cell size

Mediators of Paediatric Health Service Use

Table S2B: Characteristics stratified by GWG

| <b>Characteristics</b>                  | <b>Total</b> | <b>Below<br/>recommend.<br/>(N)</b> | <b>Recommend.<br/>(N)</b> | <b>Above<br/>recommend.<br/>(N)</b> | <b>Missing (N)</b> |
|-----------------------------------------|--------------|-------------------------------------|---------------------------|-------------------------------------|--------------------|
| <b>All births</b>                       | 258005       | 75861                               | 54302                     | 73999                               | 53843              |
| <b>Maternal age (years)</b>             |              |                                     |                           |                                     |                    |
| <20                                     | 7012         | 1900                                | 1276                      | 2452                                | 1384               |
| 20-24                                   | 29983        | 8312                                | 6034                      | 9842                                | 5795               |
| 25-29                                   | 71571        | 20017                               | 15661                     | 21833                               | 14060              |
| 30-34                                   | 92040        | 27328                               | 19956                     | 25384                               | 19372              |
| 35-40                                   | 50852        | 16079                               | 10186                     | 13068                               | 11519              |
| ≥41                                     | 6528         | 2221                                | 1189                      | 1418                                | 1700               |
| Missing                                 | 19           | **                                  | **                        | **                                  | 13                 |
| <b>Smoking during pregnancy</b>         |              |                                     |                           |                                     |                    |
| No                                      | 229007       | 67911                               | 49420                     | 66249                               | 45427              |
| Yes                                     | 21326        | 6206                                | 4262                      | 6983                                | 3875               |
| Missing                                 | 7672         | 1744                                | 620                       | 767                                 | 4541               |
| <b>Neighbourhood income quintile</b>    |              |                                     |                           |                                     |                    |
| 1 (lowest)                              | 55701        | 16647                               | 10981                     | 15992                               | 12081              |
| 2                                       | 51333        | 15192                               | 10689                     | 14746                               | 10706              |
| 3                                       | 51866        | 15021                               | 11000                     | 15304                               | 10541              |
| 4                                       | 54961        | 15468                               | 12078                     | 15941                               | 11474              |
| 5 (highest)                             | 41856        | 12875                               | 9110                      | 11321                               | 8550               |
| Missing                                 | 2288         | 658                                 | 444                       | 695                                 | 491                |
| <b>Infant sex</b>                       |              |                                     |                           |                                     |                    |
| Male                                    | 132231       | 38127                               | 27758                     | 38767                               | 27579              |
| Female                                  | 125629       | 37689                               | 26516                     | 35180                               | 26244              |
| Missing                                 | 145          | 45                                  | 28                        | 52                                  | 20                 |
| <b>Gestational age at birth (weeks)</b> |              |                                     |                           |                                     |                    |
| <37                                     | 15211        | 5641                                | 2720                      | 2965                                | 3885               |
| ≥37                                     | 242794       | 70220                               | 51582                     | 71034                               | 49958              |
| <b>Birth weight (grams)</b>             |              |                                     |                           |                                     |                    |
| <2500                                   | 11762        | 4914                                | 1995                      | 1785                                | 3068               |
| ≥2500                                   | 246243       | 70947                               | 52307                     | 72214                               | 50775              |

\*\* Compressed due to small cell size

Mediators of Paediatric Health Service Use

Table S3: Sensitivity Analyses of Factors by Missing BMI and GWG Data

| Variable                                                     |             | BMI<br>Standardized<br>Difference* | GWG<br>Standardized<br>Difference* |
|--------------------------------------------------------------|-------------|------------------------------------|------------------------------------|
| <b>Maternal<br/>smoking</b>                                  | Non-Smoker  | <b>-0.17</b>                       | -0.09                              |
|                                                              | Smoker      | -0.05                              | -0.10                              |
|                                                              | Missing     | <b>0.54</b>                        | <b>0.48</b>                        |
| <b>Gender</b>                                                | Male        | 0.00                               | -0.01                              |
|                                                              | Female      | 0.00                               | 0.01                               |
|                                                              | missing     | 0.03                               | 0.00                               |
| <b>LGA (<math>\geq 90^{\text{th}}</math><br/>percentile)</b> | No          | 0.04                               | 0.04                               |
|                                                              | Yes         | -0.04                              | -0.04                              |
|                                                              | missing     | -0.01                              | 0.00                               |
| <b>SGA <math>\leq 10^{\text{th}}</math><br/>percentile)</b>  | No          | <b>-0.28</b>                       | -0.04                              |
|                                                              | Yes         | 0.02                               | 0.04                               |
|                                                              | missing     | <b>0.45</b>                        | 0.04                               |
| <b>Presentation</b>                                          | Breech      | -0.02                              | 0.01                               |
|                                                              | Cephalic    | <b>-0.57</b>                       | <b>-0.45</b>                       |
|                                                              | Transverse  | 0.00                               | 0.01                               |
|                                                              | missing     | <b>0.65</b>                        | <b>0.65</b>                        |
| <b>Maternal Age<br/>(years)</b>                              | <20         | -0.01                              | -0.05                              |
|                                                              | 20-24       | -0.03                              | -0.09                              |
|                                                              | 25-29       | -0.05                              | -0.08                              |
|                                                              | 30-34       | 0.01                               | 0.04                               |
|                                                              | 35-40       | 0.05                               | <b>0.10</b>                        |
|                                                              | $\geq 41$   | 0.05                               | 0.07                               |
|                                                              | missing     | 0.09                               | 0.08                               |
| <b>Birth weight<br/>(grams)</b>                              | <2500       | 0.07                               | 0.08                               |
|                                                              | $\geq 2500$ | -0.07                              | -0.08                              |
| <b>Gestational<br/>Age (weeks)</b>                           | <37         | 0.07                               | 0.08                               |
|                                                              | $\geq 37$   | -0.07                              | -0.08                              |
| <b>Time to Death</b>                                         | $\leq 42$   | 0.00                               | 0.03                               |

## Mediators of Paediatric Health Service Use

|                   |         |             |             |
|-------------------|---------|-------------|-------------|
|                   | 42-365  | 0.00        | 0.01        |
|                   | 365-730 | 0.00        | 0.01        |
|                   | missing | 0.00        | -0.02       |
| <b>Birth Year</b> | 2012    | <b>0.14</b> | <b>0.10</b> |
|                   | 2013    | -0.09       | -0.05       |
|                   | 2014    | -0.07       | -0.08       |

\*Standardized differences were calculated to compare the absolute differences between those with complete maternal weight (pre-pregnancy BMI or GWG) compared to those with missing maternal weight data to ascertain if there were differences in population characteristics among those with and those without weight data. An absolute difference of >10% was considered indicative of a different distribution between the two groups.

**Pre-Pregnancy BMI: Baron-Kenny Results**

Table S4: Relationship between maternal pre-pregnancy BMI and rate of infant hospitalizations, physician visits and ED visits in the first 24 months of life (Step 1 of Baron-Kenny, Relationship A in Figure 1)

|                     | <b>Hospitalizations: IRR (95% CI)</b> |                     | <b>Physician Visits: IRR (95% CI)</b> |                     | <b>ED Visits: IRR (95% CI)</b> |                     |
|---------------------|---------------------------------------|---------------------|---------------------------------------|---------------------|--------------------------------|---------------------|
|                     | Unadjusted                            | Adjusted*           | Unadjusted                            | Adjusted*           | Unadjusted                     | Adjusted*           |
| Underweight         | 1.00<br>(0.94,1.05)                   | 0.96<br>(0.91,1.02) | 1.01<br>(1.00, 1.02)                  | 1.02<br>(1.01,1.03) | 1.06<br>(1.03,1.09)            | 0.96<br>(0.93,0.98) |
| Normal weight (ref) | 1.0                                   | 1.0                 | 1.0                                   | 1.0                 | 1.0                            | 1.0                 |
| Overweight          | 1.10<br>(1.07,1.14)                   | 1.10<br>(1.07,1.13) | 1.03<br>(1.05, 1.06)                  | 1.03<br>(1.02,1.04) | 1.12<br>(1.10,1.14)            | 1.13<br>(1.11,1.15) |
| Obese               | 1.25<br>(1.21,1.29)                   | 1.23<br>(1.19,1.27) | 1.06<br>(1.05, 1.06)                  | 1.05<br>(1.04,1.06) | 1.31<br>(1.29,1.33)            | 1.30<br>(1.28,1.32) |

\* Adjusted for maternal age, maternal smoking status, infant sex, maternal pre-existing medical conditions (diabetes, hypertension), and neighbourhood income quintile.

Table S5: Relationship between maternal pre-pregnancy BMI and adverse event in the first 24 months of life (Step 2 of Baron-Kenny, Relationship B in Figure 1)

|                     | <b>PTB: IRR (95% CI)</b> |                     | <b>SGA: IRR (95% CI)</b> |                     |
|---------------------|--------------------------|---------------------|--------------------------|---------------------|
|                     | Unadjusted               | Adjusted*           | Unadjusted               | Adjusted*           |
| Normal weight (ref) | 1.0                      | 1.0                 | 1.0                      | 1.0                 |
| Overweight          | 1.07<br>(1.02, 1.12)     | 1.04<br>(0.99,1.09) | **                       | 0.73<br>(0.70,0.76) |
| Obese               | 1.16<br>(1.10, 1.22)     | 1.07<br>(1.02,1.13) | **                       | 0.63<br>(0.60 0.66) |

\* Adjusted for maternal age, maternal smoking status, infant sex, maternal pre-existing medical conditions (diabetes, hypertension), and neighbourhood income quintile.

\*\* Hessian error message, attributed to the low cell sizes and lack of variation within the matrix.

Table S6: Relationship between SGA and rate of infant hospitalizations and ED visits in the first 24 months of life (Step 3 of Baron-Kenny, Relationship C in Figure 1)

|     | <b>Hospitalizations: IRR (95% CI)</b> |                      | <b>ED Visits: IRR (95% CI)</b> |                      |
|-----|---------------------------------------|----------------------|--------------------------------|----------------------|
|     | Unadjusted                            | Adjusted*            | Unadjusted                     | Adjusted*            |
| SGA | 1.28<br>(1.24,1.33)                   | 1.26<br>(1.21, 1.31) | 1.01<br>(0.99, 1.03)           | 0.97<br>(0.95, 0.99) |

\* Adjusted for maternal age, maternal smoking status, infant sex, maternal pre-existing medical conditions (diabetes, hypertension), and neighbourhood income quintile.

## Mediators of Paediatric Health Service Use

Table S7: Relationship between maternal pre-pregnancy BMI and rate of infant hospitalizations and ED visits in the first 24 months of life after controlling for SGA (step 4 of Baron-Kenny mediation)

|                     | <b>Hospitalizations: IRR (95% CI)</b> |                      |
|---------------------|---------------------------------------|----------------------|
|                     | Unadjusted                            | Adjusted*            |
| Normal weight (ref) | 1.0                                   | 1.0                  |
| Overweight          | 1.11<br>(1.08, 1.15)                  | 1.11<br>(1.08, 1.14) |
| Obese               | 1.26<br>(1.22,1.30)                   | 1.24<br>(1.20, 1.28) |

\* Adjusted for maternal age, maternal smoking status, infant sex, maternal pre-existing medical conditions (diabetes, hypertension) and neighbourhood income quintile.

**Gestational Weight Gain: Baron-Kenny Results**

Table S8: Relationship between maternal gestational weight gain and rate of infant hospitalizations, physician visits and ED visits in the first 24 months of life (Step 1 of Baron Kenny, Relationship A in Figure 1)

|                   | <b>Hospitalizations: IRR (95% CI)</b> |                     | <b>Physician Visits: IRR (95% CI)</b> |                     | <b>ED Visits: IRR (95% CI)</b> |                     |
|-------------------|---------------------------------------|---------------------|---------------------------------------|---------------------|--------------------------------|---------------------|
|                   | Unadjusted                            | Adjusted*           | Unadjusted                            | Adjusted*           | Unadjusted                     | Adjusted*           |
| Below recommended | 1.11<br>(1.07,1.14)                   | 1.10<br>(1.06,1.14) | 1.05<br>(1.04,1.06)                   | 1.05<br>(1.04,1.06) | 1.02<br>(1.00,1.04)            | 1.00<br>(0.98,1.01) |
| Recommended (ref) | 1.0                                   | 1.0                 | 1.0                                   | 1.0                 | 1.0                            | 1.0                 |
| Above recommended | 1.06<br>(1.03,1.09)                   | 1.04<br>(1.01,1.08) | 1.01<br>(1.01,1.02)                   | 1.01<br>(1.01,1.02) | 1.13<br>(1.12,1.15)            | 1.10<br>(1.09,1.12) |

\* Adjusted for maternal age, maternal smoking status, infant sex, maternal pre-existing medical conditions (diabetes, hypertension), and neighbourhood income quintile.

Table S9: Relationship between maternal gestational weight gain and adverse event in the first 24 months of life (Step 2 of Baron Kenny, Relationship B in Figure 1)

|                   | <b>PTB: IRR (95% CI)</b> |                     | <b>SGA: IRR (95% CI)</b> |                     |
|-------------------|--------------------------|---------------------|--------------------------|---------------------|
|                   | Unadjusted               | Adjusted*           | Unadjusted               | Adjusted*           |
| Below recommended | 1.78<br>(1.71,1.86)      | 1.77<br>(1.69,1.84) | 1.84<br>(1.78,1.91)      | 1.82<br>(1.76,1.88) |
| Recommended (ref) | 1.0                      | 1.0                 | 1.0                      | 1.0                 |
| Above recommended | **                       | **                  | **                       | **                  |

\* Adjusted for maternal age, maternal smoking status, infant sex, maternal pre-existing medical conditions (diabetes, hypertension), and neighbourhood income quintile.

\*\* Hessian error message, attributed to the low cell sizes and lack of variation within the matrix.



Mediators of Paediatric Health Service Use

Table S10: Relationship between adverse event and rate of infant hospitalizations in the first 24 months of life (Step 3 of Baron Kenny, Relationship C in Figure 1)

|     | <b>Hospitalizations: IRR (95% CI)</b> |                      |
|-----|---------------------------------------|----------------------|
|     | Unadjusted                            | Adjusted*            |
| PTB | 3.10<br>(2.99,3.21)                   | 3.01<br>(2.90,3.12)  |
| SGA | 1.28<br>(1.24, 1.33)                  | 1.26<br>(1.22, 1.31) |

\* Adjusted for maternal age, maternal smoking status, infant sex, maternal pre-existing medical conditions (diabetes, hypertension), and neighbourhood income quintile.

Table S11: Relationship between GWG and and rate of infant hospitalizations in the first 24 months of life after controlling for PTB and SGA (step 4 of Baron Kenny mediation)

|                   | <b>PTB:<br/>IRR (95% CI)</b> |                     | <b>SGA:<br/>IRR (95% CI)</b> |                      |
|-------------------|------------------------------|---------------------|------------------------------|----------------------|
|                   | Unadjusted                   | Adjusted*           | Unadjusted                   | Adjusted*            |
| Below recommended | 1.00<br>(0.97,1.03)          | 1.01<br>(0.98,1.04) | 1.05<br>(1.02, 1.09)         | 1.06<br>(1.02, 1.09) |
| Recommended (ref) | 1.0                          | 1.0                 | 1.0                          | 1.0                  |

\* Adjusted for maternal age, maternal smoking status, infant sex, maternal pre-existing medical conditions (diabetes, hypertension), and neighbourhood income quintile.
